# Supplementary material for: Structure of the human gonadotropin-releasing hormone receptor GnRH1R reveals an unusual ligand binding mode
Source: PubMed Central journal article supplement (PMC7576152; doi:10.1038/s41467-020-19109-w), 2020-10-20
Supplement: 41467_2020_19109_MOESM1_ESM.pdf [file 41467_2020_19109_MOESM1_ESM.pdf]

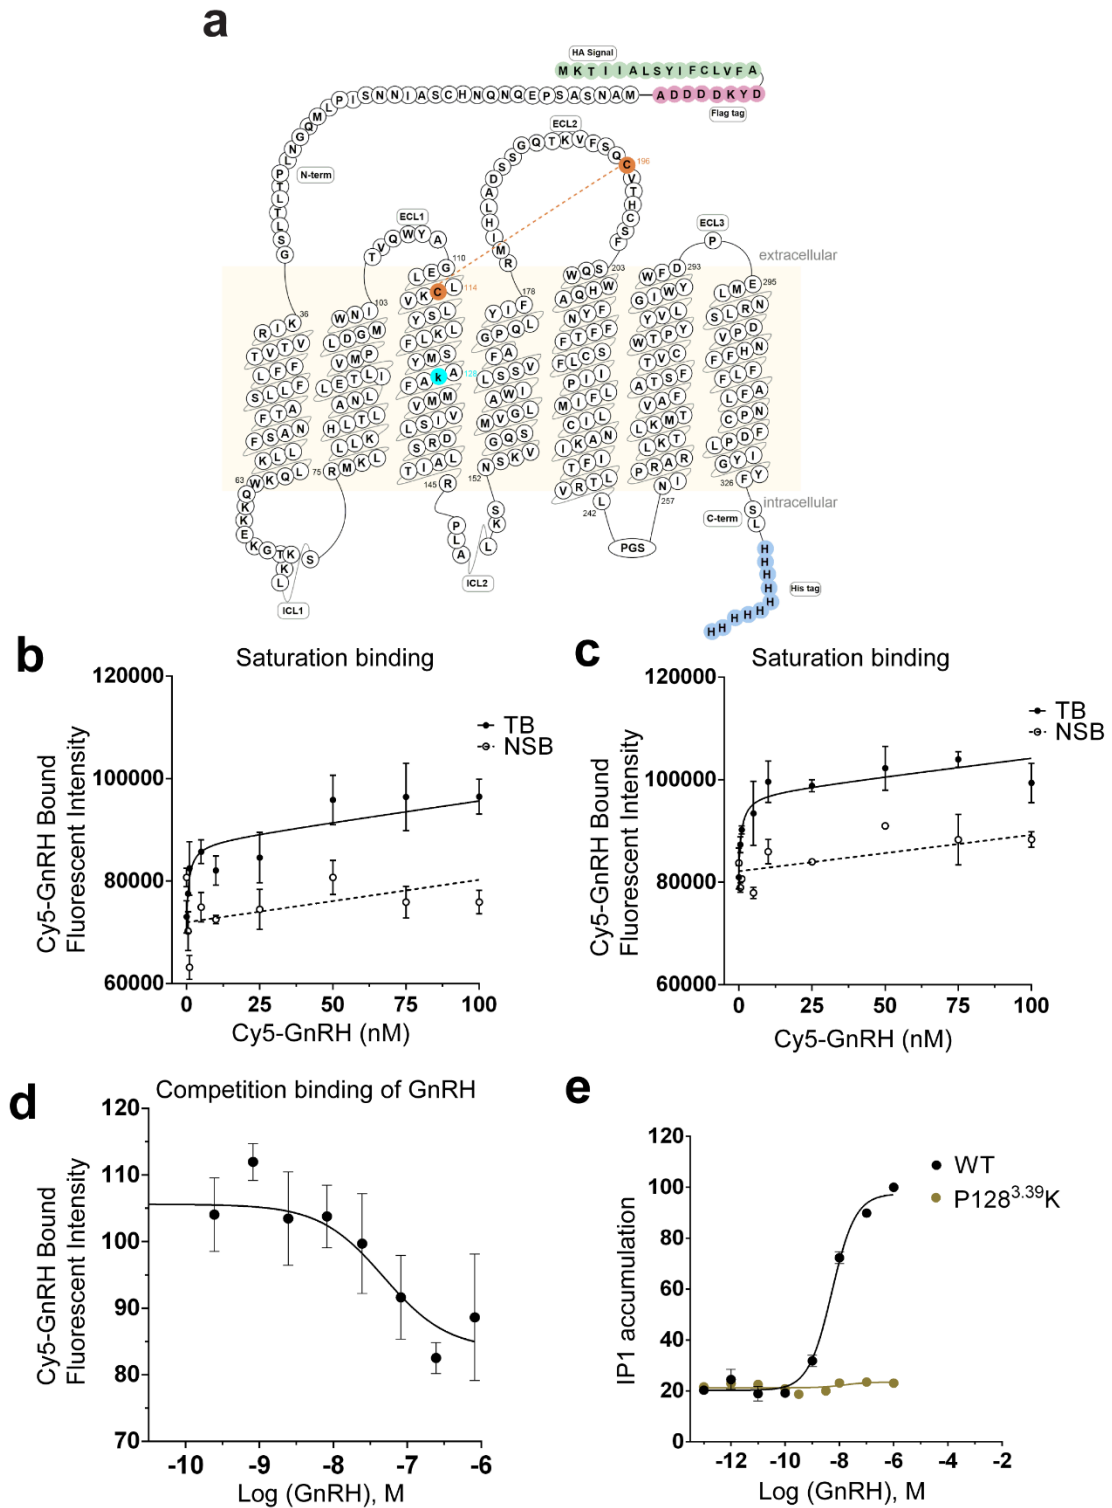

**Supplementary Figure 1. GnRH binding assay and IP accumulation assay of GnRH1R constructs.**

(a) Snake plot of the GnRH1R construct for crystallization. Residues 243-256 of ICL3 were replaced by PGS fusion domain. Mutation P128<sup>3.39</sup>K is highlighted in cyan color. The conserved disulfide bond is indicated by a dashed orange line. HA signal, Flag

tag and His tag are shown in green, salmon, and violet respectively.

- (b) Saturation binding of Cy5-GnRH on the wild-type (WT) GnRH1R. Fluorescent intensity was measured at Ex640/Em680 nm. The total binding (TB) and non-specific binding (NSB) were determined in the absence or presence of a 100-fold higher concentration of GnRH respectively. The  $K_d$  value is about  $0.82 \pm 1.4$  nM. The  $K_d$  values are expressed as means  $\pm$  SEM (n=3) at 2 times independently experiment repeats with similar results.
- (c) Saturation binding of Cy5-GnRH on the GnRH1R with P128<sup>3.39</sup>K mutation. This mutant still retain the same level affinity ( $K_d = 0.92 \pm 1.3$  nM) with GnRH as the WT GnRH1R. The  $K_d$  values are expressed as means  $\pm$  SEM (n=3) at 2 times independently experiment repeats with similar results.
- (d) Competition binding of the agonist GnRH to the GnRH1R with P128<sup>3.39</sup>K mutation. The  $pIC_{50}$  value is  $7.3 \pm 0.72$ . For experiments (b), (c), (d), COS-7 cells were transiently transfected with the wild-type or P128<sup>3.39</sup>K mutant receptors (without PGS), and Fluorescent intensity was measured after stimulation with Cy5-GnRH ligands for 4 h. The  $pIC_{50}$  values are expressed as means  $\pm$  SEM (n=3) at 2 times independently experiment repeats with similar results.
- (e) IP accumulation assay of GnRH1R WT and GnRH1R P128<sup>3.39</sup>K mutant. HEK293T were transiently transfected with the wild-type or P128<sup>3.39</sup>K mutant receptors (without PGS), and IP accumulation was measured after stimulation with GnRH ligands for 2 h.  $EC_{50}$  values are expressed as means  $\pm$  SEM (n=3) at 3 times independently experiment repeats with similar results. The mean  $EC_{50} \pm$  SEM (nM) are shown in Supplementary Table 2.

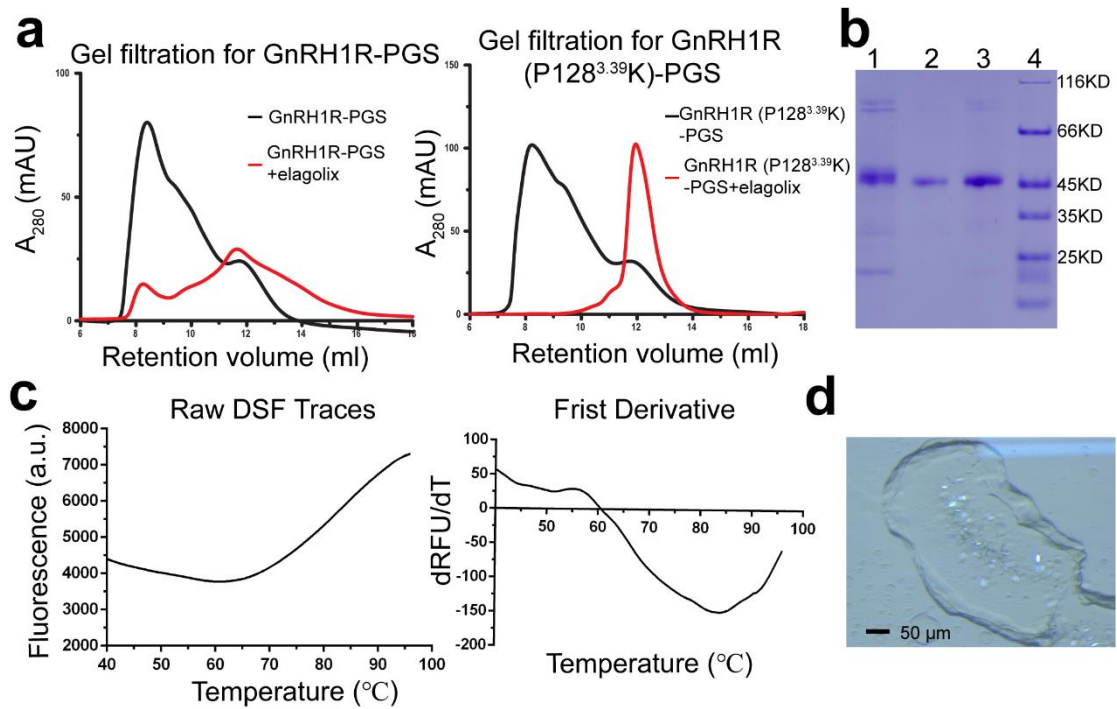

### Supplementary Figure 2. Purification of the GnRH1R constructs.

- Superdex 200 gel filtration traces for both GnRH1R-PGS and GnRH1R (P128<sup>3.39K</sup>)-PGS in the absence or presence of GnRH1R antagonist elagolix.
- SDS-PAGE analysis of samples in different steps of elagolix bound GnRH1R (P128<sup>3.39K</sup>)-PGS purification. 4 lanes from left to right, 1: TALON IMAC chromatography purified receptor, 2: the deglycosylated receptor with PNGase F, 3: final sample after gel filtration, 4: Marker (MW in KD at right).
- Raw DSF trace of the elagolix-bound GnRH1R (P128<sup>3.39K</sup>)-PGS and first derivative analysis of data in Raw DSF trace. The apparent melting temperature ( $T_m$  value = 83°C) revealed a thermostabilized receptor for crystallization.
- Polarizing microscopy image of GnRH1R crystals in LCP drop.

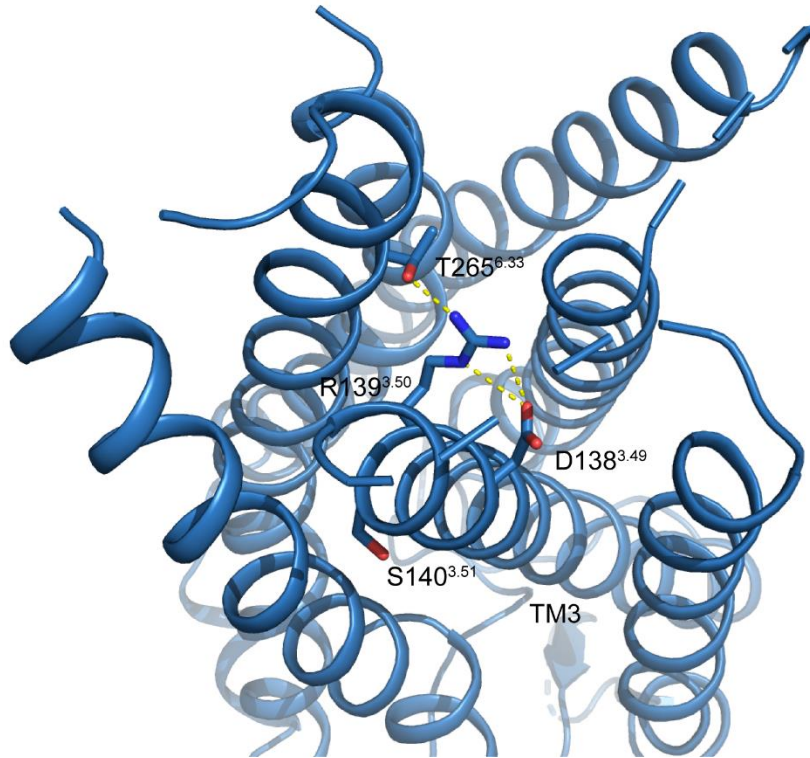

**Supplementary Figure 3. D<sup>3.49</sup>-R<sup>3.50</sup>-S<sup>3.51</sup> motif in GnRH1R.**

The residue R139<sup>3.50</sup> in D<sup>3.49</sup>-R<sup>3.50</sup>-S<sup>3.51</sup> motif of GnRH1R was locked by intra-helical hydrogen bonding with D138<sup>3.49</sup>, as well as forming interaction with T265<sup>6.33</sup> in TM6. GnRH1R show as sky blue cartoon and the hydrogen bonds displayed as dotted yellow lines.

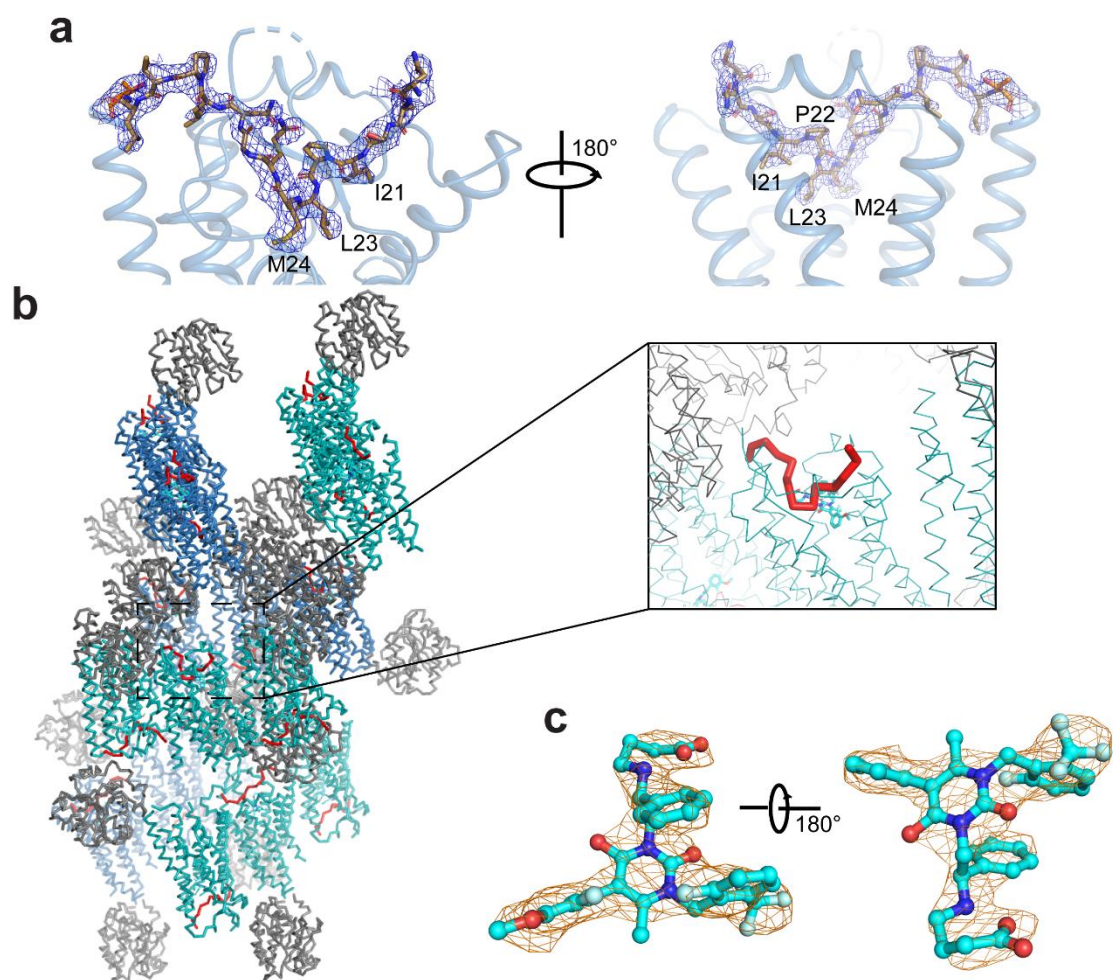

**Supplementary Figure 4. Representative packing and electron density for the GnRH1R crystal structure.**

- (a) 2|Fo|-|Fc| map (contoured at 1.0  $\sigma$ ) of residues 18-33 at the N-terminal of receptor. Receptor is shown in sky blue cartoon and residues 18-33 are in sand sticks.
- (b) Lattice packing interactions in the monoclinic crystals of GnRH1R (P128<sup>3.39</sup>K)-PGS. Protomers are shown as cartoons, with the receptor component of the fusion protein colored teal or sky blue, the PGS domain was colored gray, The N terminal region of GnRH1R was shown as red ribbon.
- (c) 2|Fo|-|Fc| map (contoured at 2.0  $\sigma$ ) for elagolix. The ligand is represented as cyan stick.

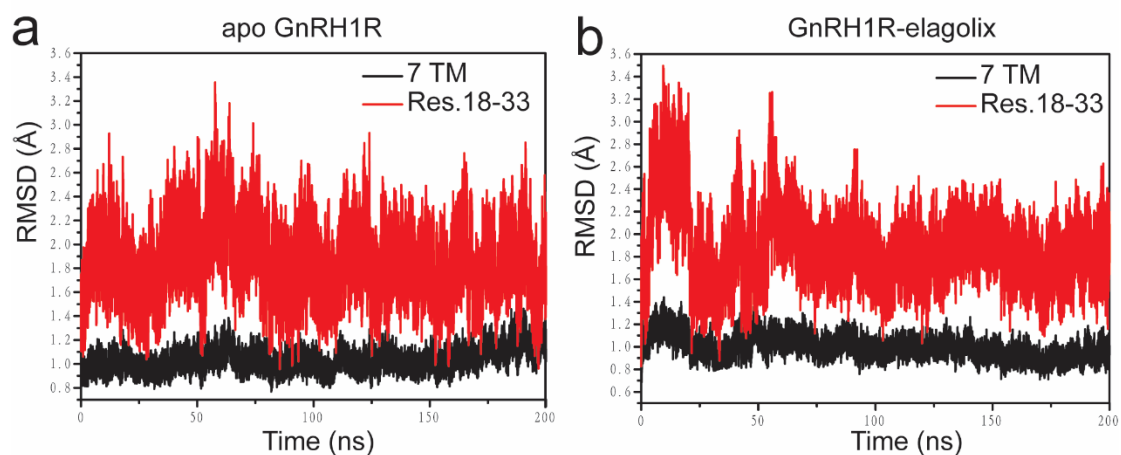

**Supplementary Figure 5. Molecular dynamics (MD) simulations of the GnRH1R structure.**

- (a) 200-ns MD simulation of the GnRH1R apo receptor (after removing the PGS fusion protein and ligand, details were described in methods). Black trace was for the 7 TM of receptor, red trace was for the residues 18-33 in the N-terminal of receptor.
- (b) 200-ns MD simulation of the elagolix-bound GnRH1R receptor. Black trace was for the 7TM of receptor, red trace was for the residues 18-33 in the N-terminal of the receptor. TM: transmembrane helix, Res: residues.

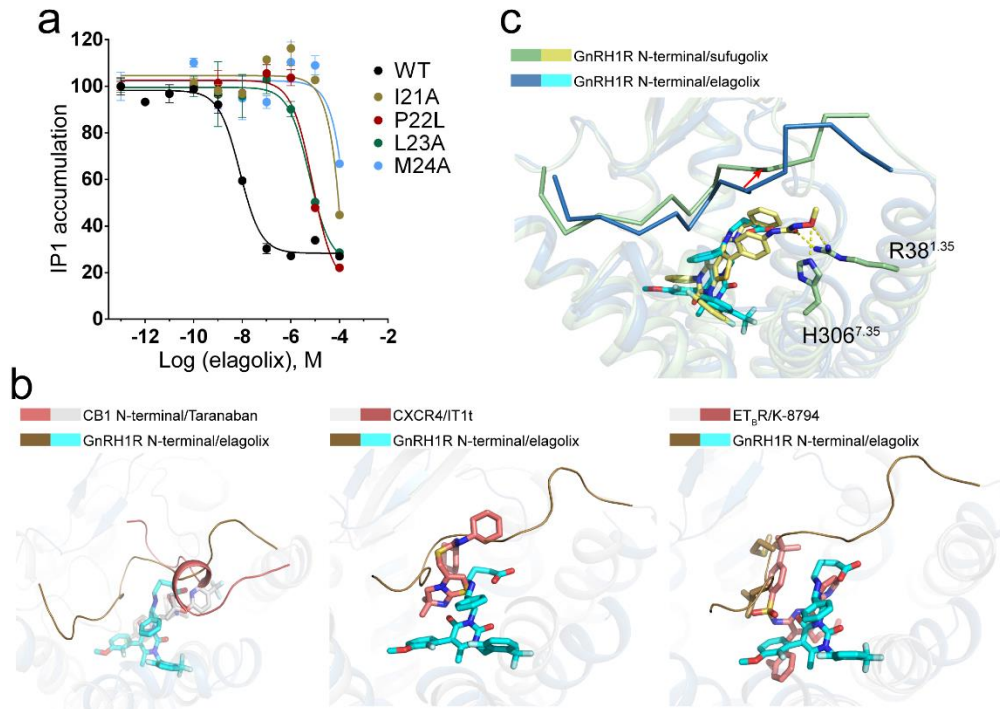

**Supplementary Figure 6. Structural comparison with elagolix bound GnRH1R.**

- (a) Antagonist elagolix dose-dependent response curves of GnRH1R WT and N-terminal mutants stimulated by GnRH agonist determined by IP assays. HEK293T were transiently transfected with the wild-type or mutant receptors (without PGS), and IP accumulation was measured after stimulation with GnRH ligands for 2 h. IC<sub>50</sub> values are expressed as means ± SEM (n=3) at 3 times independently experiment repeats with similar results. The mean EC<sub>50</sub> ± SEM (nM) are shown in Supplementary Table 2.
- (b) Structural comparison between elagolix-bound GnRH1R with other GPCRs. Left panel: comparison with taranabant bound CB1 (PDB ID: 5U09), middle panel: comparison with T1t bound CXCR4 (PDB ID: 3ODU), right panel: comparison with K-8794 bound ET<sub>B</sub>R (PDB ID: 5X93). N terminus of GnRH1R was shown as sand cartoon, and the ligands elagolix and was shown as cyan sticks. N terminus of CB1 was shown as pink cartoon and taranabant was shown as gray sticks. CXCR4 and ET<sub>B</sub>R were shown as gray cartoon, IT1t and K-8794 were shown as pink sticks.
- (c) Structural superposition of GnRH1R in complex with elagolix (cyan), sufugolix (pale yellow). The side-chains of H306<sup>7.35</sup> and R38<sup>1.35</sup> form hydrogen bonds with sufugolix.

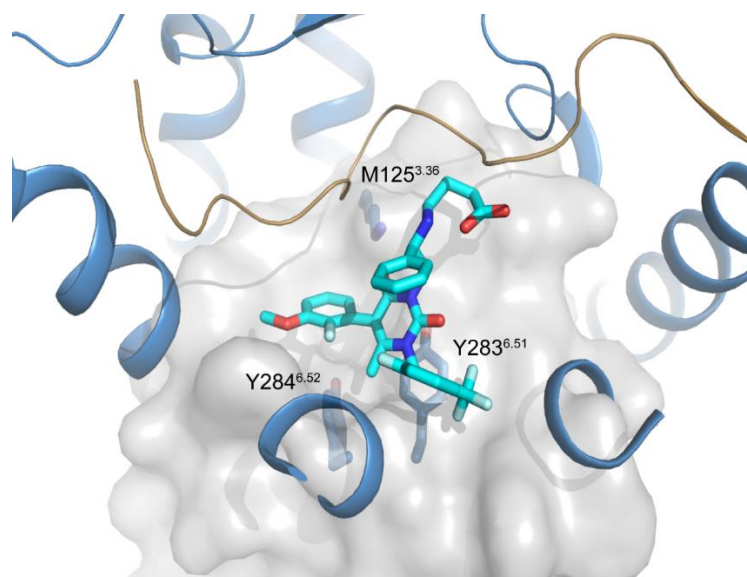

**Supplementary Figure 7. The bottom wall of the orthosteric pocket in elagolix bound GnRH1R receptor.**

The bottom surface is shown gray color. The side chains of M125<sup>3.36</sup>, Y283<sup>6.51</sup> and Y284<sup>6.52</sup> are shown as sky blue sticks, and elagolix is shown as cyan sticks.



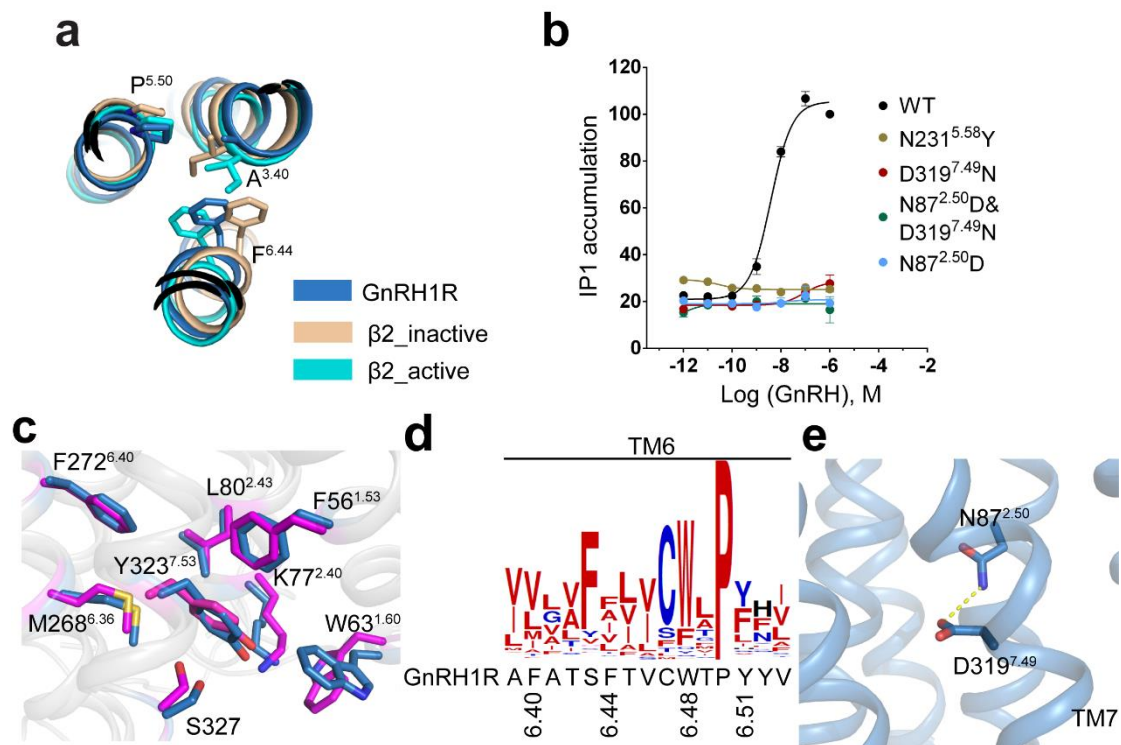

**Supplementary Figure 8. Structural comparison of GnRH1R with other receptors.**

- (a) P<sup>5.50</sup>-I<sup>3.40</sup>-F<sup>6.44</sup> motif in both GnRH1R (sky blue) and β<sub>2</sub> receptor, β<sub>2</sub>\_inactive (PDB ID: 2RH1) displayed as wheat cartoon, β<sub>2</sub>\_inactive (PDB ID: 4IDE) colored as cyan cartoon.
- (b) IP accumulation assays on wild type (WT) and GnRH1R mutants. HEK293T were transiently transfected with the wild-type or mutant receptors (without PGS), and IP accumulation was measured after stimulation with GnRH ligands for 2 h. EC<sub>50</sub> values are expressed as means ± SEM (n=3) at 3 times independently experiment repeats with similar results. The mean EC<sub>50</sub>± SEM (nM) are shown in Supplementary Table 2.
- (c) Structural comparison NPxxY motif between GnRH1R in crystal structure (sky blue) GnRH1R in 200 ns MD structure (pink).
- (d) Sequence logos of TM6 for GnRH1R with class A GPCRs.
- (e) The side chains of residues N87<sup>2.50</sup> and D319<sup>7.49</sup> form hydrogen bond in GnRH1R. GnRH1R show as sky blue cartoon and the hydrogen bonds displayed as dotted yellow lines.

**Supplementary Table 1. Data collection and refinement statistics**

|                                                     | GnRH1R-PGS with<br>elagolix <sup>Ω</sup> |
|-----------------------------------------------------|------------------------------------------|
| <b>Data collection</b>                              |                                          |
| Space group                                         | P3 <sub>1</sub> 21                       |
| Cell dimensions                                     |                                          |
| <i>a</i> , <i>b</i> , <i>c</i> (Å)                  | 74.0, 74.0, 231.2                        |
| $\alpha$ , $\beta$ , $\gamma$ (°)                   | 90, 90, 120                              |
| Resolution (Å)                                      | 50 (2.80) <sup>†</sup>                   |
| <i>R</i> <sub>merge</sub>                           | 0.166 (1.04)                             |
| <i>I</i> / $\sigma$ <i>I</i>                        | 6.50 (0.71)                              |
| Completeness (%)                                    | 89.9 (92.4)                              |
| Redundancy                                          | 3.6                                      |
| <i>CC</i> <sub>1/2</sub> in highest shell           | 0.53                                     |
| <b>Refinement</b>                                   |                                          |
| Resolution (Å)                                      | 31.1-2.80                                |
| No. reflections                                     | 13249                                    |
| <i>R</i> <sub>work</sub> / <i>R</i> <sub>free</sub> | 0.24/ 0.28                               |
| No. atoms                                           |                                          |
| Protein                                             | 3638                                     |
| Ligand                                              | 45                                       |
| Other (Lipid and Solvent)                           | 87                                       |
| B-factors                                           |                                          |
| Receptor                                            | 45.3                                     |
| Fusion protein                                      | 61.9                                     |
| Ligand                                              | 40.0                                     |
| Other (Lipid and Solvent)                           | 50.6                                     |
| R.m.s deviations                                    |                                          |
| Bond lengths (Å)                                    | 0.005                                    |
| Bond angles (°)                                     | 0.78                                     |
| Ramachandran plot statistics (%)                    |                                          |
| Favored regions                                     | 93.1                                     |
| Allowed regions                                     | 6.9                                      |
| Disallowed regions                                  | 0                                        |

<sup>Ω</sup> Diffraction data from 23 crystals were merged into a complete data set.

<sup>†</sup> Values in parentheses are for highest-resolution shell

**Supplementary Table 2.**

**Summary of IP assays (this study) and reported binding affinity for GnRH1R WT and mutants.**

| Receptor mutant                                  | Signal Transduction IP assays |                         |                         |                       | Displacement Binding Experiments from Reference |                       |
|--------------------------------------------------|-------------------------------|-------------------------|-------------------------|-----------------------|-------------------------------------------------|-----------------------|
|                                                  |                               | GnRH                    | elagolix                | GnRH                  | NBI-42902                                       |                       |
| GnRH1R                                           | Expression level              | EC <sub>50</sub> (nM)   | E <sub>max</sub> (x100) | IC <sub>50</sub> (nM) | IC <sub>50</sub> (nM)                           | IC <sub>50</sub> (nM) |
| WT                                               | 1.0±0.0062                    | 3.9±0.44                | 0.96                    | 8.0±1.2               | 8.1 <sup>a</sup>                                | 0.90 <sup>a</sup>     |
| I21A                                             | 1.1±0.052                     | 3.6±0.41                | 0.73                    | ND                    |                                                 |                       |
| P22L                                             | 0.92±0.037                    | 3.3±0.52                | 1.0                     | 7.9±2.2 <sup>†</sup>  |                                                 |                       |
| L23A                                             | 1.0±0.082                     | 4.9±0.85                | 0.77                    | 5.8±2.3 <sup>†</sup>  |                                                 |                       |
| M24A                                             | 0.93±0.033                    | 3.6±0.82                | 0.72                    | ND                    | 2.2 <sup>a</sup>                                | 4.2 <sup>a, †</sup>   |
| R38 <sup>1.35</sup> A                            | 0.84±0.023                    | ND                      | 0.20                    | -                     |                                                 |                       |
| N87 <sup>2.50</sup> D                            | 0.88±0.055                    | ND                      | 0.21                    | -                     |                                                 |                       |
| D98 <sup>2.61</sup> A                            | 0.94±0.021                    | ND                      | 0.20                    | -                     |                                                 |                       |
| N102 <sup>2.65</sup> A                           | 1.2±0.20                      | 0.33±0.077 <sup>†</sup> | 0.74                    | -                     |                                                 |                       |
| K121 <sup>3.32</sup> Q                           | 1.6±0.81                      | ND                      | 0.21                    | -                     |                                                 |                       |
| M125 <sup>3.36</sup> A                           | 1.3±0.25                      | ND                      | 0.18                    | -                     |                                                 |                       |
| P128 <sup>3.39</sup> K                           | 0.91±0.017                    | ND                      | 0.24                    | -                     |                                                 |                       |
| Q174 <sup>4.60</sup> A                           | 0.88±0.13                     | 21±2.8                  | 0.59                    | -                     | 17 <sup>b</sup>                                 |                       |
| F178 <sup>4.64</sup> A                           | 0.99±0.024                    | 76±30                   | 0.92                    | -                     | 9.3 <sup>b, †</sup>                             |                       |
| N231 <sup>5.58</sup> Y                           | 0.88±0.036                    | ND                      | 0.25                    | -                     |                                                 |                       |
| F272 <sup>6.40</sup> V                           | 0.99±0.13                     | ND                      | 0.28                    | -                     |                                                 |                       |
| F272 <sup>6.40</sup> L                           | 2.4±0.37                      | 2.9±0.64                | 1.0                     | -                     | 4.4 <sup>a</sup>                                | 1.5 <sup>a</sup>      |
| W280 <sup>6.48</sup> F                           | 0.93±0.0040                   | ND                      | 0.18                    | -                     | 10 <sup>a</sup>                                 | 5.5 <sup>a</sup>      |
| Y283 <sup>6.51</sup> F                           | 1.3±0.15                      | 7.7±3.1 <sup>†</sup>    | 0.39                    | ND                    | 0.32 <sup>a, †</sup>                            | 14 <sup>a</sup>       |
| Y283 <sup>6.51</sup> A                           | 1.0±0.083                     | ND                      | 19.7                    | -                     |                                                 |                       |
| Y284 <sup>6.52</sup> F                           | 2.1±0.26                      | 7.6±1.5                 | 0.48                    | 1.6±0.34 <sup>†</sup> | 2.8 <sup>a</sup>                                | 2.3 <sup>a</sup>      |
| L286 <sup>6.54</sup> A                           | 1.3±0.22                      | 69±8.6                  | 0.91                    | 0.28±7.4 <sup>†</sup> |                                                 |                       |
| Y290 <sup>6.58</sup> A                           | 0.97±0.012                    | 2.7±0.40 <sup>†</sup>   | 0.65                    | -                     |                                                 |                       |
| H306 <sup>7.36</sup> A                           | 0.91±0.020                    | 55±25                   | 0.29                    | -                     | 51 <sup>a</sup>                                 | 1.4 <sup>a</sup>      |
| F308 <sup>7.38</sup> A                           | 1.0±0.027                     | 4.9±0.69                | 1.0                     | 35±6.5                |                                                 |                       |
| D319 <sup>7.49</sup> N                           | 1.0±0.20                      | ND                      | 0.28                    | -                     |                                                 |                       |
| Y323 <sup>7.53</sup> F                           | 1.3±0.20                      | 21±5.1                  | 0.57                    | -                     |                                                 |                       |
| Y323 <sup>7.53</sup> A                           | 0.82±0.014                    | ND                      | 1.0                     | -                     |                                                 |                       |
| N87 <sup>2.50</sup> D&<br>D319 <sup>7.49</sup> N | 0.95±0.012                    | ND                      | 0.19                    | -                     |                                                 |                       |

ND means that the EC<sub>50</sub> or IC<sub>50</sub> values could not be calculated based on the experimental data, a: the dates were cited by the reference 29, b: the dates were cited by the reference 34, †: the value multiplied by 10<sup>3</sup>. HEK293T were transiently transfected with the wild-type

or mutant receptors (without PGS), and IP accumulation was measured after stimulation with GnRH ligands for 2 h. EC<sub>50</sub> values are expressed as means  $\pm$  SEM (n=3) at 3 times independently experiment repeats with similar results.

**Supplementary Table 3.**

**Summary of codon-optimized human GnRH1R gene.**

|                                                           |                                                                                                                                                                                                                                                                                                                                                                                                                                                                                                                                                                                                                                                                                                                                                                                                                                                                                                                                                                                                                                                                                                                |
|-----------------------------------------------------------|----------------------------------------------------------------------------------------------------------------------------------------------------------------------------------------------------------------------------------------------------------------------------------------------------------------------------------------------------------------------------------------------------------------------------------------------------------------------------------------------------------------------------------------------------------------------------------------------------------------------------------------------------------------------------------------------------------------------------------------------------------------------------------------------------------------------------------------------------------------------------------------------------------------------------------------------------------------------------------------------------------------------------------------------------------------------------------------------------------------|
| codon-<br>optimized<br>human<br>GnRH1<br>receptor<br>gene | ATGGCCAACCTCCGCCTCCCCCGAACAGAACCAGAACCACCTGCTCCG<br>CTATCAACAACCTCCATCCCCCTGATGCAGGGTAACCTGCCCACTCTG<br>ACCCTGAGCGGTAAGATCCGCGTCACCGTGACCTTCTTCCTGTTCT<br>GCTGAGCGCTACCTTCAACGCTTCCTTCCTGCTGAAGCTGCAGAAGT<br>GGACCCAGAAGAAGGAAAAGGGCAAGAAGCTGTCCCGCATGAAGCT<br>GCTGCTGAAGCACCTGACTCTGGCCAACCTGCTGGAGACCCTGATC<br>GTGATGCCCTGGACGGCATGTGGAACATCACTGTCCAGTGGTACG<br>CTGGCGAACTGCTGTGCAAGGTGCTGAGCTACCTGAAGCTGTTTCA<br>CATGTACGCTCCCGCCTTCATGATGGTGGTGTGATCTCCCTGGACCGT<br>CCCTGGCTATCACTCGTCCTCTGGCCCTGAAGTCCAACCTCCAAGGTG<br>GGCCAGAGCATGGTTGGCCTGGCTTGGATCCTGAGCTCCGTGTTCCG<br>CTGGCCCTCAGCTGTACATCTTCGCATGATCCACCTGGCTGACTCC<br>TCCGGTCAGACCAAGGTCTTCAGCCAGTGCCTGACTCACTGCAGCT<br>TCTCCAGTGGTGGCACCAGGCCTTCTACAACCTTCTTACCTTCTCC<br>TGCCTGTTTCATCATCCCTCTGTTTCATCATGCTGATCTGCAACGCCAA<br>GATCATCTTACCCTGACTCGCGTCCTGCACCAGGACCCCCACGAG<br>CTGCAGCTGAACCAGAGCAAGAACAACATCCCTCGCGCCCGCCTGA<br>AGACTCTGAAGATGACTGTGGCCTTCGCTACCTCCTTCACTGTCTGC<br>TGGACTCCTTACTACGTGCTGGGCATCTGGTACTGGTTCGACCCTGA<br>AATGCTGAACCGTCTGAGCGACCCTGTCAACCACTTCTTCTTCCTGT<br>TCGCCTTCCTGAACCCCTGCTTCGACCCTCTGATCTACGGTACTTC<br>TCCCTG |
|-----------------------------------------------------------|----------------------------------------------------------------------------------------------------------------------------------------------------------------------------------------------------------------------------------------------------------------------------------------------------------------------------------------------------------------------------------------------------------------------------------------------------------------------------------------------------------------------------------------------------------------------------------------------------------------------------------------------------------------------------------------------------------------------------------------------------------------------------------------------------------------------------------------------------------------------------------------------------------------------------------------------------------------------------------------------------------------------------------------------------------------------------------------------------------------|

**Supplementary Table 4.****Primers for site-directed mutagenesis.**

| Primer                | Forward                 | Reverse                 |
|-----------------------|-------------------------|-------------------------|
| pFastbac-1 vector     |                         |                         |
| P128 <sup>3.39K</sup> | AGGCCTTCATGATGGTGGTG    | TAGCGTACATGCTGAACAGCTTC |
| pcDNA 3.1 (+) vector  |                         |                         |
| I21A                  | CCCCACTGATGCAGGGCAAC    | CGCTGTTGTTGATGGCTGAAC   |
| P22L                  | TGCTGATGCAGGGCAACCTC    | GGATGCTGTTGTTGATGGCTG   |
| L23A                  | CCATGCAGGGCAACCTCCC     | CTGGGATGCTGTTGTTGATGGC  |
| M24A                  | CCCAGGGCAACCTCCCCAC     | CCAGTGGGATGCTGTTGTTGATG |
| R38 <sup>1.35A</sup>  | CCGTGACGGTTACTTTCTTCC   | CGATCTTCCAGACAAGGTCAG   |
| N87 <sup>2.50D</sup>  | ATCTGTTGGAGACTCTGATTG   | CGGCTAAGGTCAGATGTTTTAAG |
| D98 <sup>2.61A</sup>  | CCGGGATGTGGAACATTACAG   | CCAGTGGCATGACAATCAGAG   |
| N102 <sup>2.65A</sup> | CCATTACAGTCCAATGGTATGC  | CCCACATCCCATCCAGTGG     |
| K121 <sup>3.32Q</sup> | AACTTTTCTCCATGTATGCCCC  | GTAGATAACTGAGAACTTTGCAG |
| M125 <sup>3.36A</sup> | CCTATGCCCCAGCCTTC       | CGGAGAAAAGCTTTAGATAACTG |
| P128 <sup>3.39K</sup> | AAGCCTTCATGATGGTGGTG    | TGGCATACATGGAGAAAAGC    |
| Q174 <sup>4.60A</sup> | GCATTATACATCTTCAGGATG   | TGGTCCTGCAAAGACACTAC    |
| F178 <sup>4.64A</sup> | GCCAGGATGATTCATCTAGC    | GATGTATAACTGTGGTCCTGC   |
| N231 <sup>5.58Y</sup> | ATGCAAAAATCATCTTCACCC   | AGCAGATCAGCATGATGAAAAG  |
| F272 <sup>6.40V</sup> | TCGCCACTTCATTTACTGTCTG  | CTGCAACCGTCATTTTTAGAGTC |
| F272 <sup>6.40L</sup> | TAGCCACTTCATTTACTGTCTG  | GTGCAACCGTCATTTTTAGAGTC |
| W280 <sup>6.48F</sup> | TTACTCCCTACTATGTCTTAGG  | AGCAGACAGTAAATGAAGTGG   |
| Y283 <sup>6.51F</sup> | CCTTTTATGTCCTAGGAATTTG  | GAGTCCAGCAGACAGTAAATG   |
| Y283 <sup>6.51A</sup> | CCTATGTCCTAGGAATTTGG    | CGGGAGTCCAGCAGAC        |
| Y284 <sup>6.52F</sup> | TTGTCCTAGGAATTTGGTATTG  | AGTAGGGAGTCCAGCAG       |
| L286 <sup>6.54A</sup> | CAGGAATTTGGTATTGGTTTG   | CGACATAGTAGGGAGTCCAG    |
| Y290 <sup>6.58A</sup> | CATGGTTTGATCCTGAAATG    | CCCAAATTCCTAGGACATAG    |
| H306 <sup>7.36A</sup> | CCTTCTTCTTTCTTTTGCC     | CATTTACTGGGTCTGACAAC    |
| F308 <sup>7.38A</sup> | CCTTTCTCTTTGCCTTTTTAAAC | CGAAGTGATTTACTGGGTC     |
| D319 <sup>7.49N</sup> | CTTTAACCCACTTATCTATGG   | CATGGGTTTTAAAAGGCAAAGAG |
| Y323 <sup>7.53F</sup> | TTGGATATTTTTCTCTGTGATC  | AGATAAGTGGATCAAAGCATG   |
| Y323 <sup>7.53A</sup> | CCGGATATTTTTCTCTGTGATC  | CGATAAGTGGATCAAAGCATG   |
